# Supplementary material for: Exploring the Sensitivity Range of Underlying Surface Factors for Waterlogging Control
Source: MDPI journal article supplement (doi:10.3390/w15173131), 2023-08-31
Supplement: s1 [file s1]

## Exploring the Sensitive Range of Underlying Surface Factors for Waterlogging Control

### 3.1.1. Sensitivity changes with rainfall characteristics for P-Imperv

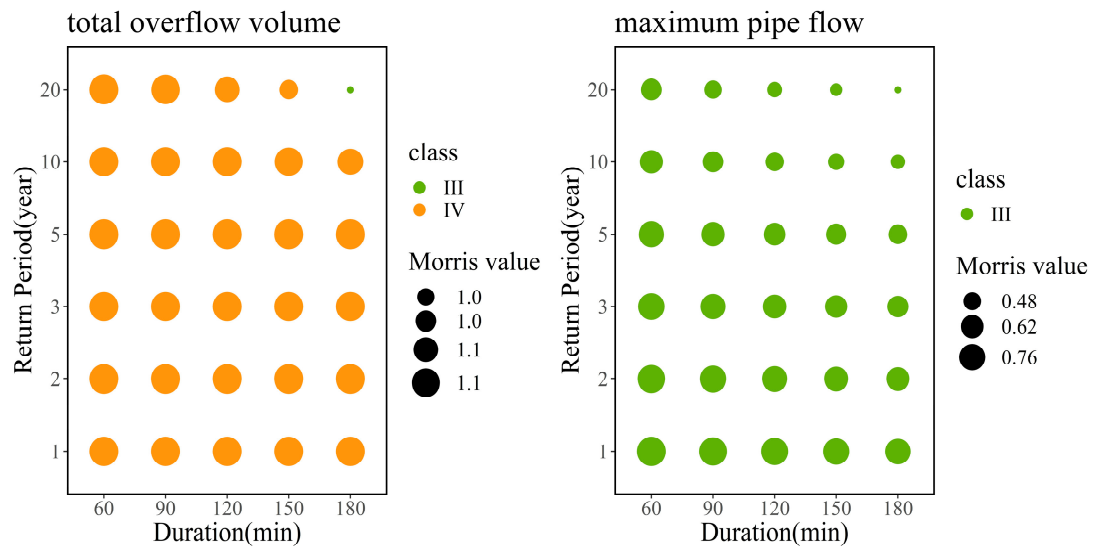

Figure S1. Sensitivity of the P-Imperv in Zhuyuan communities under different rainfall conditions

### 3.1.2. Patterns of change in sensitivity with P-Imperv variations

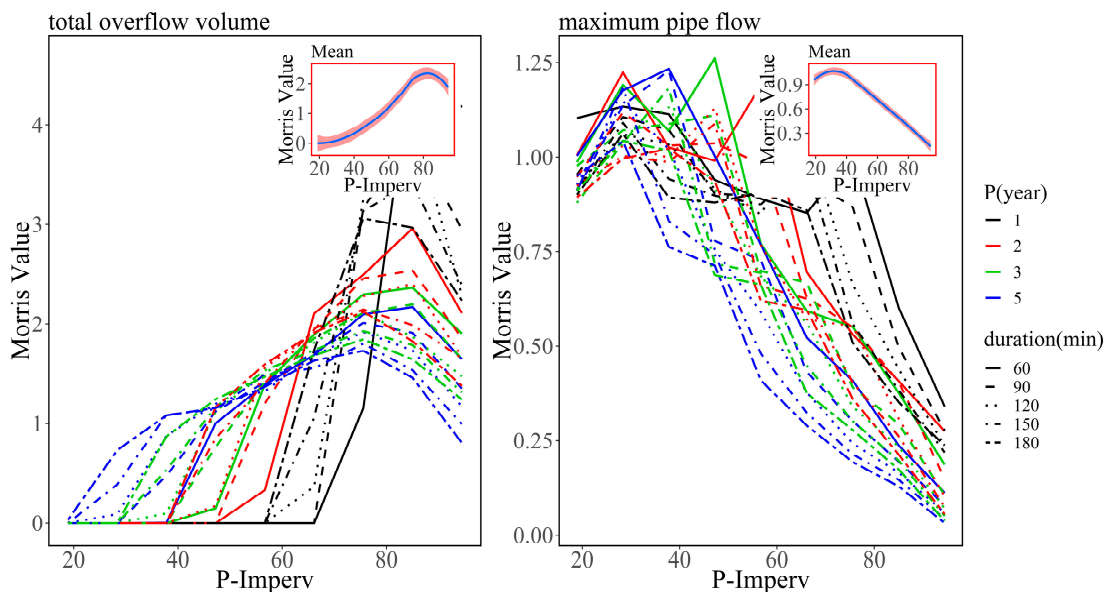

Figure S2. The patterns of change in sensitivity with the P-Imperv in Zhuyuan community

### 3.2.1. Sensitivity changes with rainfall characteristics for PV-H

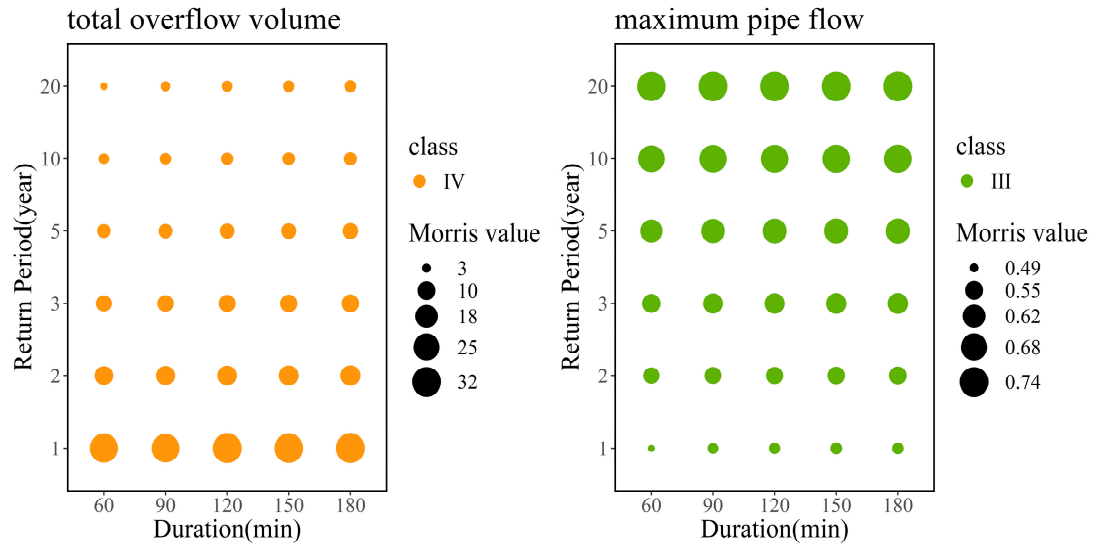

Figure S3. Sensitivity of the PV-H in Zhuyuan communities under different rainfall conditions

### 3.2.2. Patterns of change in sensitivity with PV-H variations

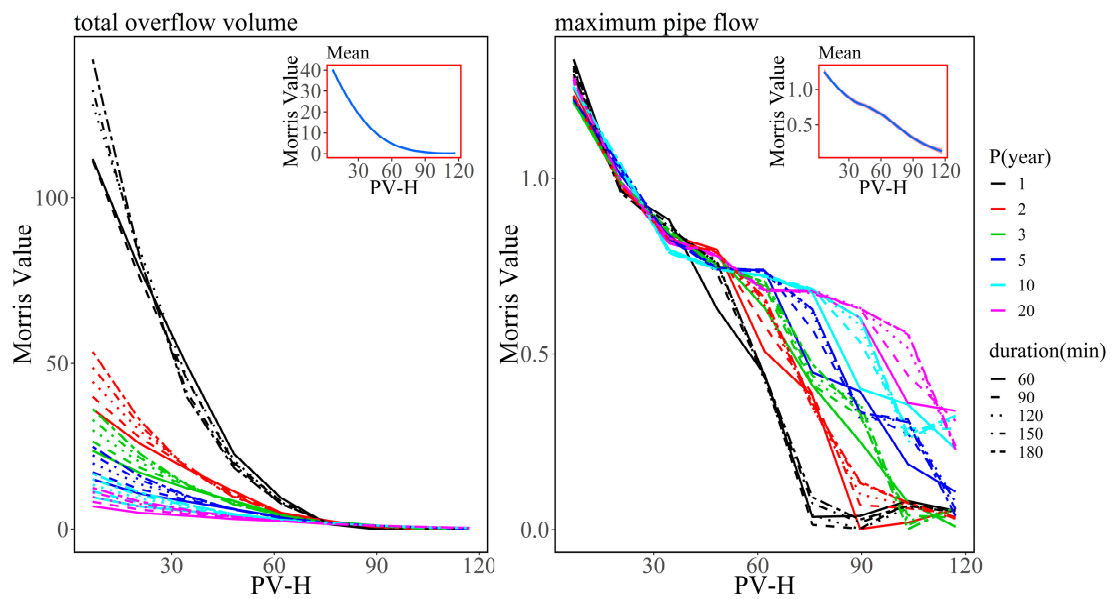

Figure S4. The patterns of change in sensitivity with the PV-H in Zhuyuan community

### 3.3.1. Sensitivity changes with rainfall characteristics for slope

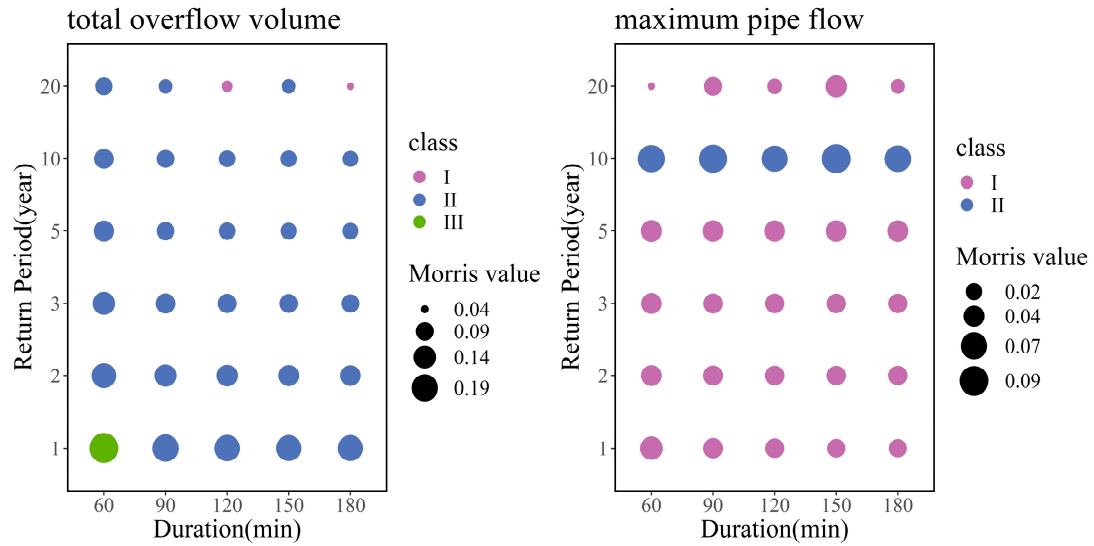

Figure S5. Sensitivity of the sd slope in Niujiulong communities under different rainfall conditions

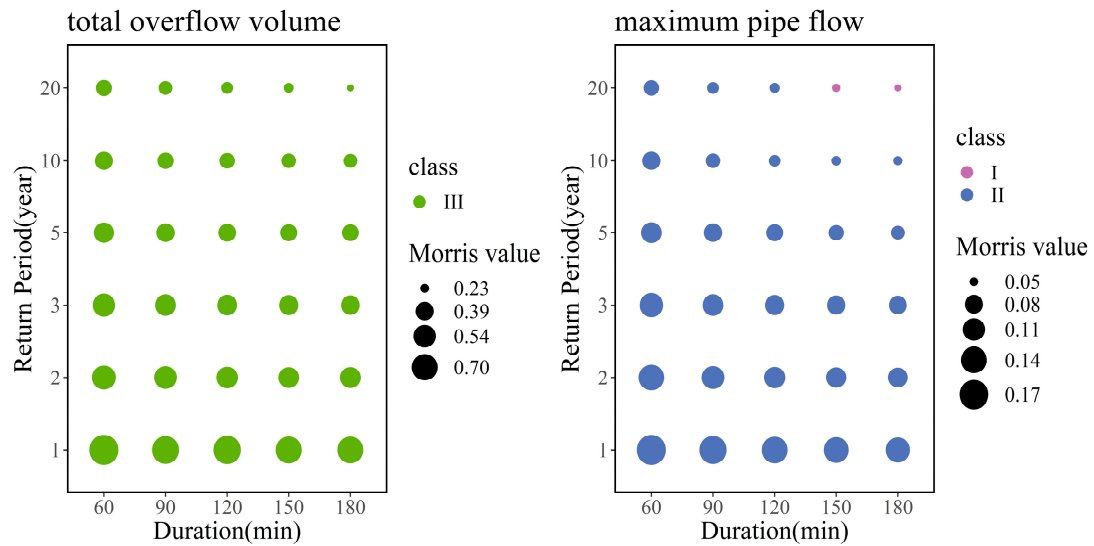

Figure S6. Sensitivity of the mean slope in Zhuyuan communities under different rainfall conditions

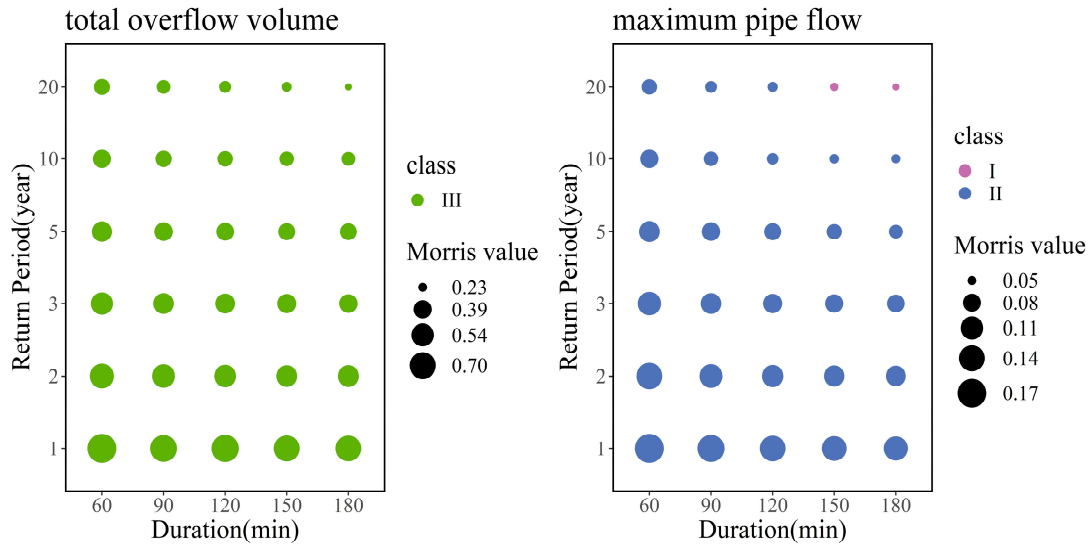

Figure S7. Sensitivity of the sd slope in Zhuyuan communities under different rainfall conditions

### 3.3.2. Patterns of change in sensitivity with slope variations

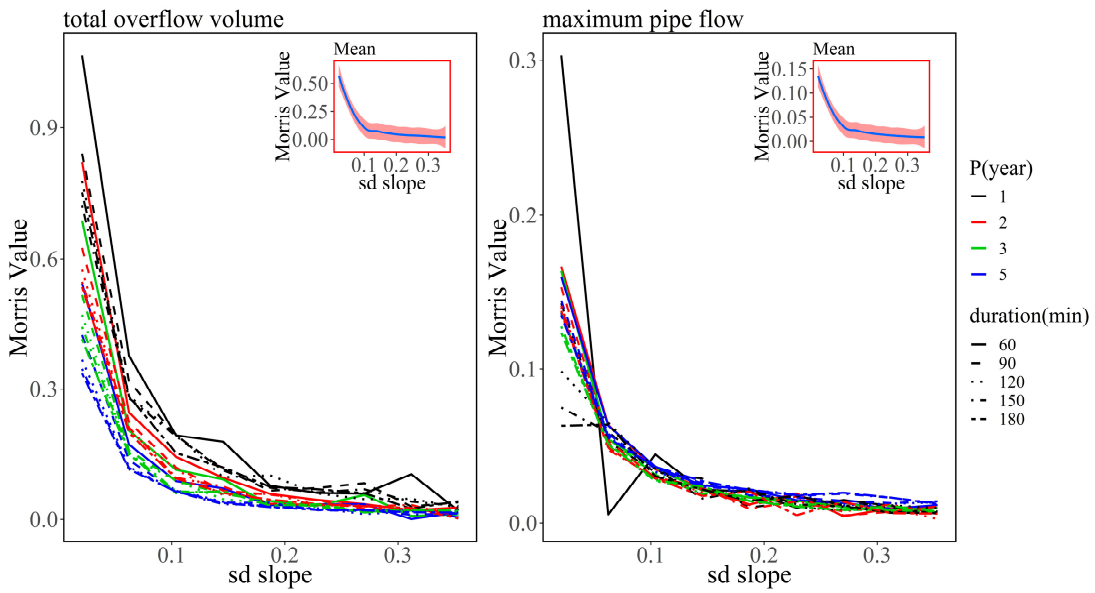

Figure S8. The patterns of change in sensitivity with the sd slope in Niujiulong community

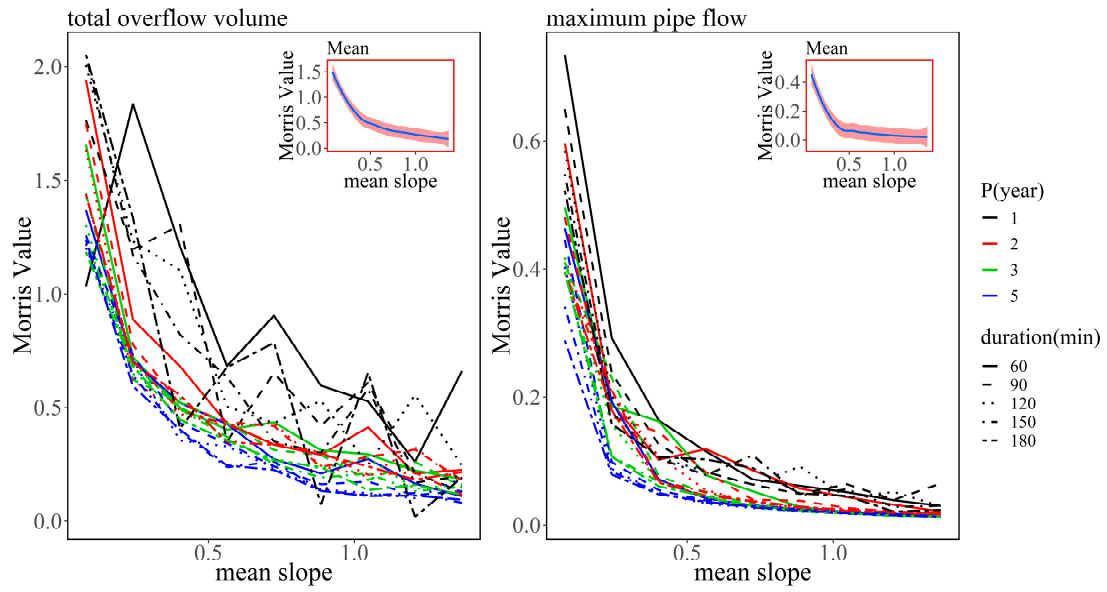

Figure S9. The patterns of change in sensitivity with the mean slope in Zhuyuan community

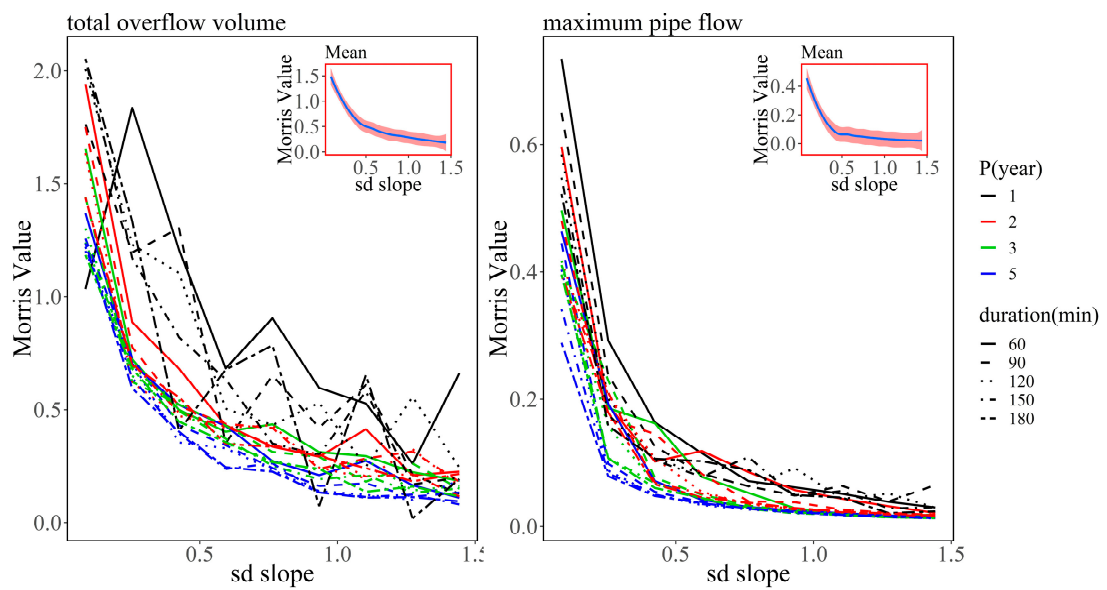

Figure S10. The patterns of change in sensitivity with the sd slope in Zhuyuan community
