# Supplementary material for: Exploring the Sensitivity Range of Underlying Surface Factors for Waterlogging Control
Source: MDPI journal article supplement (doi:10.3390/w15173131), 2023-08-31
Supplement: s1 [file s1]

Archive with 1 entries (1 files):
- water-2538099-supplementary.pdf
